# Supplementary material for: Structures, fluorescence and magnetism of a series of coordination polymers driven by a tricarboxypyridine ligand
Source: Royal Society of Chemistry journal article supplement (doi:10.1039/d2ce00726f), 2022-01-01
Supplement: d2ce00726f1.pdf [file d2ce00726f1.pdf]

# Supporting Information

## Structures, Fluorescence and Magnetism of a Series of Coordination Polymers Driven by Tricarboxypyridine Ligand

Qiang Zhao, Qi-yang Li, Jing Li

Email:zhaoqiang0522@126.com

(College of Chemistry and Pharmaceutical Engineering, Nanyang Normal University, Nanyang, 473061 China)

### 1. Synthesis

#### 1.1 Synthesis of complex $[\text{Zn}(\mu_3\text{-Hcppa})\cdot 2\text{H}_2\text{O}]_n$ (1), $[\text{Cd}(\mu_4\text{-Hcppa}) \cdot \text{H}_2\text{O}]_n$ (2), $[\text{Co}(\mu_2\text{-H}_2\text{cppa})_2 \cdot 2\text{H}_2\text{O}]_n$ (6) and $[\text{Fe}(\mu_2\text{-H}_2\text{cppa})_2 \cdot 2\text{H}_2\text{O}]_n$ (8)

A mixture of  $\text{H}_3\text{cppa}$  (0.3 mmol),  $\text{Zn}(\text{NO}_3)_2\cdot 6\text{H}_2\text{O}$  ( $\text{Cd}(\text{NO}_3)_3\cdot 4\text{H}_2\text{O}$  or  $\text{FeSO}_4\cdot 7\text{H}_2\text{O}$ ) (1 mmol) and distilled  $\text{H}_2\text{O}$  (10 mL) was sealed in a 25 mL Teflon-lined autoclave and heated to 160 °C at  $10.8^\circ\text{C}\cdot\text{h}^{-1}$ . After maintained for 72 h, the reaction vessel was cooled to 10 °C at a rate of  $5^\circ\text{C}\cdot\text{h}^{-1}$ .

**$[\text{Zn}(\mu_3\text{-Hcppa})\cdot 2\text{H}_2\text{O}]_n$  (1):** Light yellow crystals were collected with ca. 63% yield based on  $\text{H}_3\text{cppa}$ . Elemental Anal. Calc. for  $\text{Zn C}_{14}\text{H}_{10}\text{NO}_9$ : (C, 41.87%; H, 2.51%; N, 3.49% Found: C, 41.56%; H, 2.37%; N, 3.16%. FT-IR (KBr pellets,  $\text{cm}^{-1}$ ): 3420, 3016, 1736, 1682, 1556, 1394, 1257, 1161, 1033, 985, 923, 835, 760, 683.

**$[\text{Cd}(\mu_4\text{-Hcppa}) \cdot \text{H}_2\text{O}]_n$  (2):** Light yellow crystals were collected with ca. 47% yield based on  $\text{H}_3\text{cppa}$ . Elemental Anal. Calc. for  $\text{CdC}_{14}\text{H}_9\text{NO}_8$ : C, 38.96%; H, 2.10%; N, 3.25% Found: 39.32%; H, 2.51%; N, 3.54% FT-IR (KBr pellets,  $\text{cm}^{-1}$ ): 3435, 3037, 1618, 1540, 1373, 1261, 1160, 1073, 993, 917, 864, 772, 685.

**$[\text{Co}(\mu_2\text{-H}_2\text{cppa})_2 \cdot 2\text{H}_2\text{O}]_n$  (6):** Light red crystals were collected with ca. 49% yield based on  $\text{H}_3\text{cppa}$ . Elemental Anal. Calc. for  $\text{CoC}_{28}\text{H}_{20}\text{N}_2\text{O}_{16}$ : C, 48.08%; H, 2.88%; N, 4.01% Found: C, 48.35%; H, 3.11%; N, 4.43%. FT-IR (KBr pellets,  $\text{cm}^{-1}$ ): 3403, 3051, 1709, 1596, 1552, 1464, 1385, 1313, 1255, 1176, 1034, 947, 761, 691.

**$[\text{Fe}(\mu_2\text{-H}_2\text{cppa})_2 \cdot 2\text{H}_2\text{O}]_n$  (8):** Yellow crystals were collected with ca. 39% yield based on  $\text{H}_3\text{cppa}$ . Elemental Anal. Calc. for  $\text{FeC}_{28}\text{H}_{20}\text{N}_2\text{O}_{16}$ : C, 48.30%; H, 2.90%; N,

4.02% Found: C, 47.89%; H, 3.33%; N, 4.36%. FT-IR (KBr pellets,  $\text{cm}^{-1}$ ): 3408, 3052, 1709, 1553, 1463, 1394, 1312, 1223, 1178, 1033, 980, 912, 828, 762, 687.

## 1. 2 Synthesis of complex $[\text{Mn}(\mu_2\text{-Hcppa}) \cdot (\text{phen}) \cdot \text{H}_2\text{O}]_n$ (4) and $[\text{Co}(\mu_3\text{-Hcppa}) \cdot (\text{phen}) \cdot 2\text{H}_2\text{O}]_n$ (7)

A mixture of  $\text{H}_2\text{cppa}$  (0.2 mmol),  $\text{Mn}(\text{NO}_3)_2 \cdot 4\text{H}_2\text{O}$  or  $\text{Co}(\text{NO}_3)_3 \cdot 6\text{H}_2\text{O}$  (0.25 mmol), NaOH (0.2mmol) and distilled  $\text{H}_2\text{O}$  (8 mL) was sealed in a 25 mL Teflon-lined autoclave and heated to 120 °C at  $10.8^\circ\text{C} \cdot \text{h}^{-1}$ . After maintained for 72 h, the reaction vessel was cooled to 10 °C at a rate of  $5^\circ\text{C} \cdot \text{h}^{-1}$ .

**$[\text{Mn}(\mu_2\text{-Hcppa}) \cdot (\text{phen}) \cdot \text{H}_2\text{O}]_n$  (4):** Yellow crystals were collected with ca. 53% yield based on  $\text{H}_3\text{cppa}$ . Elemental Anal. Calc. for  $\text{MnC}_{26}\text{H}_{17}\text{N}_3\text{O}_8$ : C, 56.33%; H, 3.09%; N, 7.58% Found: C, 56.63%; H, 3.42%; N, 7.86%. FT-IR (KBr pellets,  $\text{cm}^{-1}$ ): 3080, 1697, 1621, 1568, 1518, 1428, 1372, 1227, 1145, 973, 840, 777, 701, 672.

**$[\text{Co}(\mu_3\text{-Hcppa}) \cdot (\text{phen}) \cdot 2\text{H}_2\text{O}]_n$  (7):** Dark red crystals were collected with ca. 67% yield based on  $\text{H}_3\text{cppa}$ . Elemental Anal. Calc. for  $\text{CoC}_{26}\text{H}_{19}\text{N}_3\text{O}_9$ : C, 54.18%; H, 3.32%; N, 7.29% Found: C, 54.56%; H, 3.60%; N, 7.61%. FT-IR (KBr pellets,  $\text{cm}^{-1}$ ): 2928, 1709, 1591, 1515, 1464, 1393, 1297, 1228, 1160, 990, 817, 752.

## 1. 3 Synthesis of complex $[\text{Cd}(\mu_2\text{-H}_2\text{cppa})_2 \cdot 2\text{H}_2\text{O}]_n$ (3)

A mixture of  $\text{H}_2\text{cppa}$  (0.2 mmol),  $\text{Cd}(\text{NO}_3)_2 \cdot 4\text{H}_2\text{O}$  (0.5 mmol), 4,4'-Bipyridine (0.2mmol) and distilled  $\text{H}_2\text{O}$  (10 mL) was sealed in a 25 mL Teflon-lined autoclave and heated to 120 °C at  $10.8^\circ\text{C} \cdot \text{h}^{-1}$ . After maintained for 72 h, the reaction vessel was cooled to 10 °C at a rate of  $5^\circ\text{C} \cdot \text{h}^{-1}$ . Light brown crystals were collected with ca. 42% yield based on  $\text{H}_3\text{cppa}$ . Elemental Anal. Calc. for  $\text{CdC}_{28}\text{H}_{20}\text{N}_2\text{O}_{16}$ : C, 44.67%; H, 2.68%; N, 3.72% Found: C, 44.86%; H, 2.96%; N, 3.49%. FT-IR (KBr pellets,  $\text{cm}^{-1}$ ): 3419, 3053, 1713, 1682, 1600, 1556, 1415, 1386, 1220, 1157, 1045, 1008, 912, 827, 729, 630.

## 1.4 Synthesis of complex $[\text{Co}_3(\mu_3\text{-cppa})_2 \cdot 19\text{H}_2\text{O}]_n$ (5)

A mixture of  $\text{H}_2\text{cppa}$  (0.25 mmol),  $\text{Co}(\text{NO}_3)_2 \cdot 6\text{H}_2\text{O}$  (0.75 mmol), NaOH (0.75mmol) and distilled  $\text{H}_2\text{O}$  (10 mL) was sealed in a 25 mL Teflon-lined autoclave and heated to 120 °C at  $10.8^\circ\text{C} \cdot \text{h}^{-1}$ . After maintained for 72 h, the reaction vessel was cooled to 10 °C at a rate of  $5^\circ\text{C} \cdot \text{h}^{-1}$ . Red crystals were collected with ca. 51% yield based on  $\text{H}_3\text{cppa}$ . Elemental Anal. Calc. for  $\text{C}_{28}\text{H}_{50}\text{Co}_3\text{N}_2\text{O}_{33}$ : C, 30.04%; H, 4.50%; N,

2.50% Found: C, 30.43%; H, 4.72%; N, 2.85%. FT-IR (KBr pellets,  $\text{cm}^{-1}$ ): 3181, 1556, 1473, 1385, 1305, 1263, 1157, 1031, 986, 839, 799, 773, 692.

## 2. Topology diagram

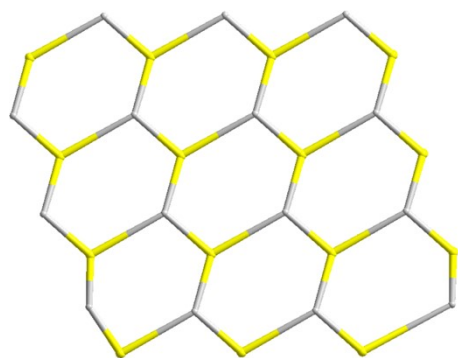

**a**

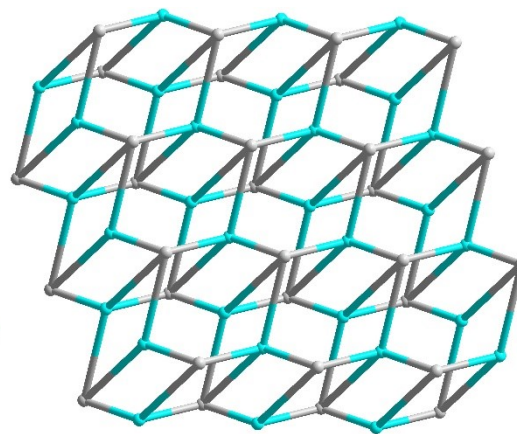

**b**

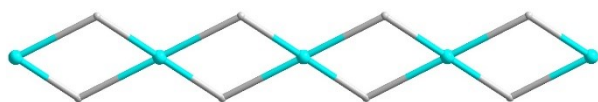

**c**

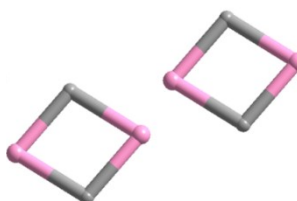

**d**

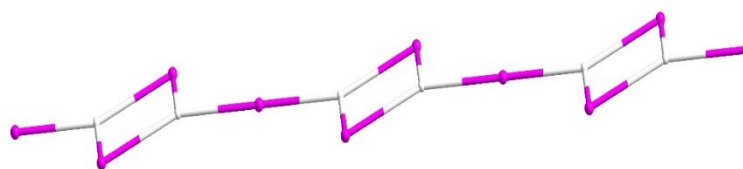

**e**

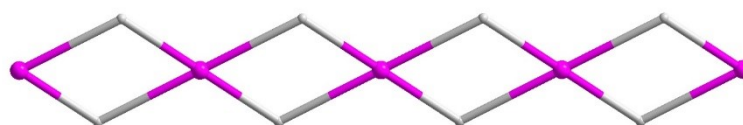

**f**

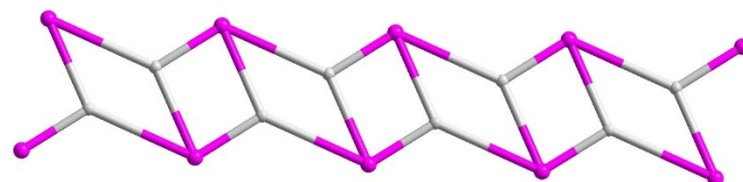

**g**

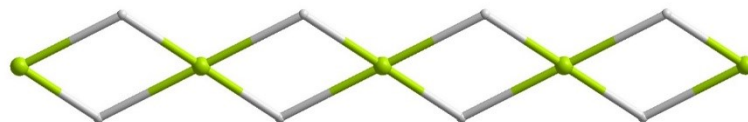

h

Fig. S1 Topology diagram complexes 1-8; a (Zn: yellow code, Hcppa<sup>2-</sup>: grey code); b (Cd: Cyan code, Hcppa<sup>2-</sup>: grey code); c (Cd: Cyan code, H<sub>2</sub>cppa<sup>2-</sup>: grey code); d (Mn: pink code, Hcppa<sup>2-</sup>: grey code); e (Co: purple code, cppa<sup>3-</sup>: grey code); f (Co: purple code, H<sub>2</sub>cppa<sup>2-</sup>: grey code); g (Co: purple code, Hcppa<sup>2-</sup>: grey code); h (Fe: green code, Hcppa<sup>2-</sup>: grey code).

### 3. Powder X-ray diffraction

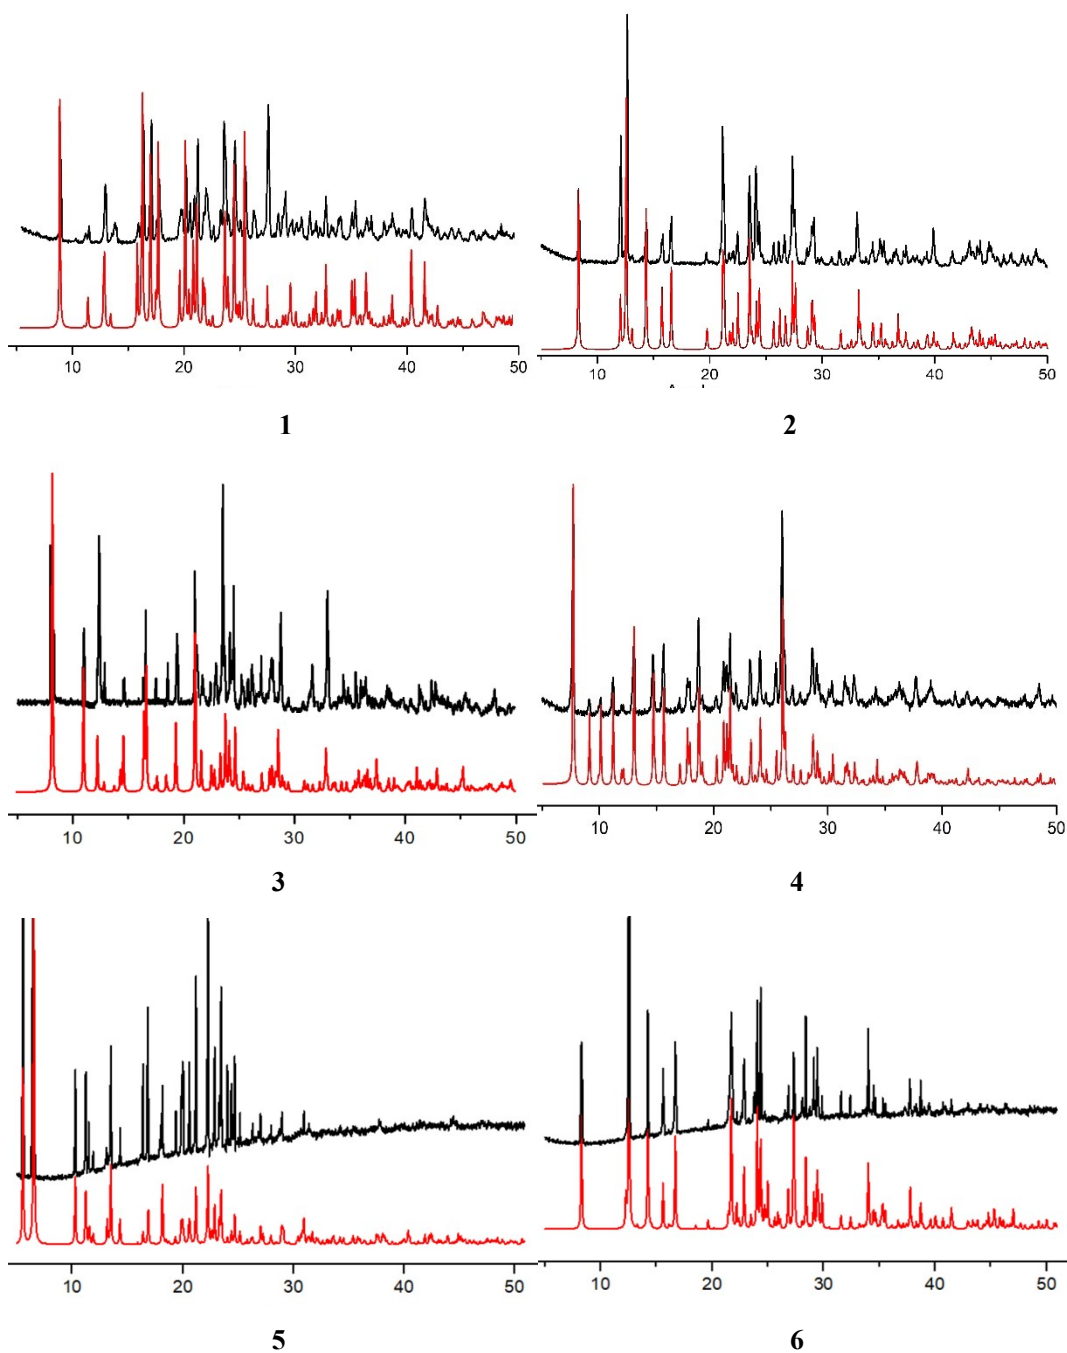

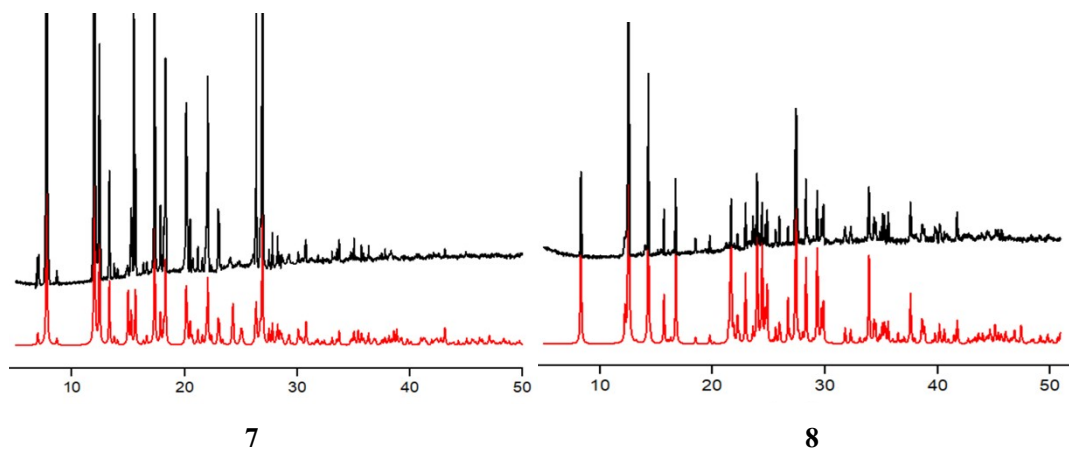

Fig. S2 Powder diffraction plot of complexes 1-8 (black: experimental value, red: simulate value)

#### 4. Thermogravimetric analysis

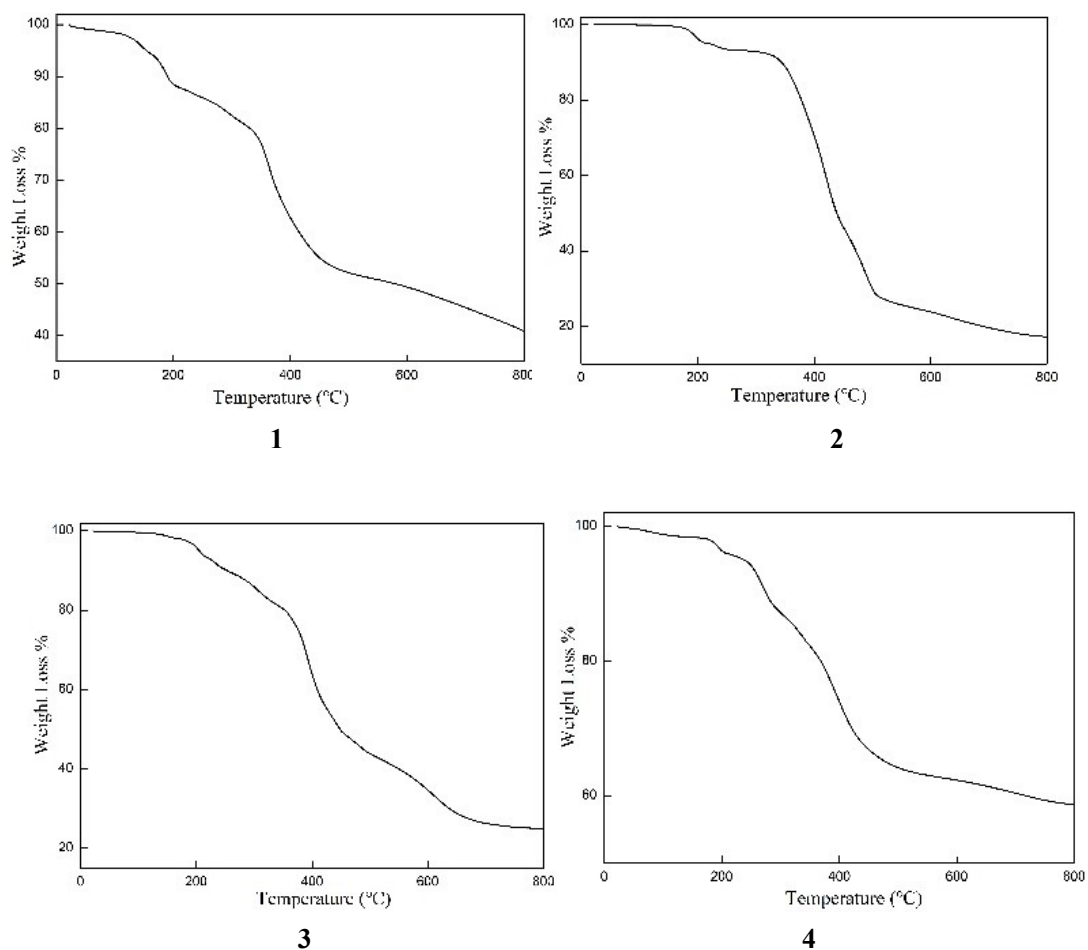

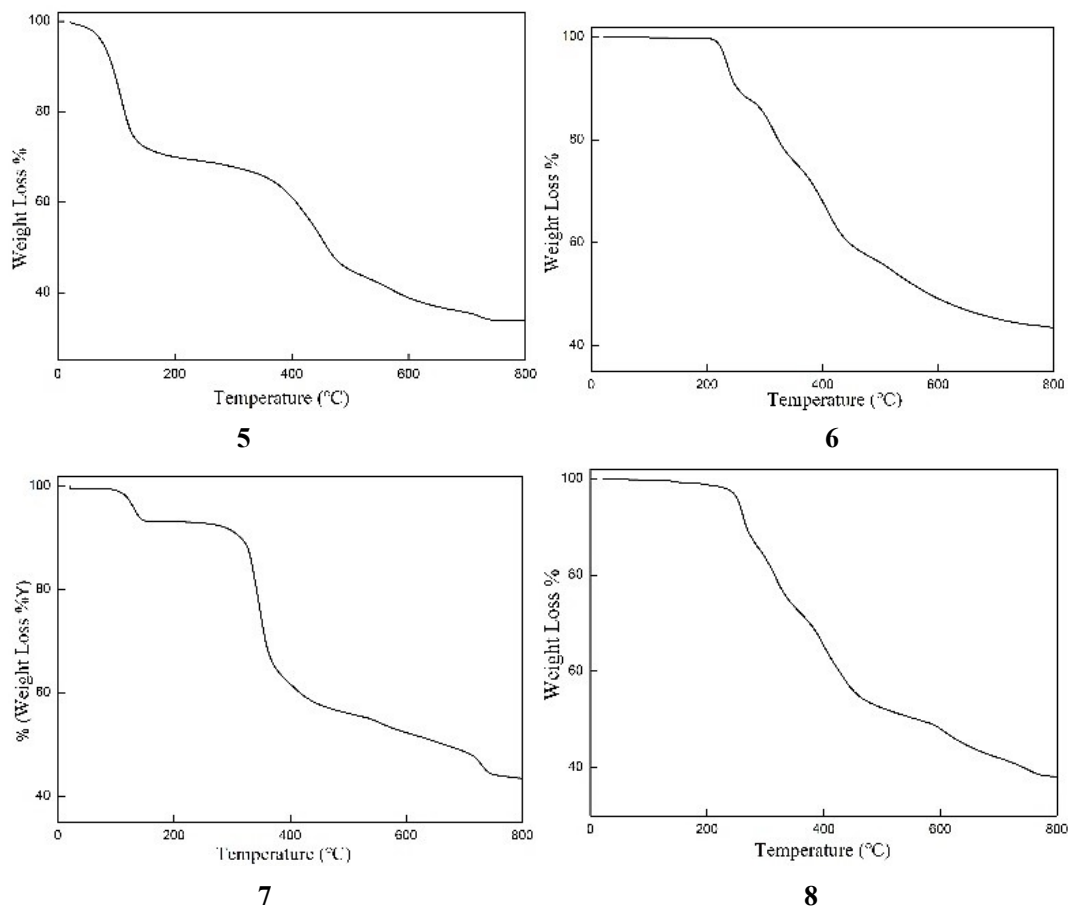

Fig. S3 Thermogravimetric analysis curve of complex 1-8

### 5. Infra-red spectrogram

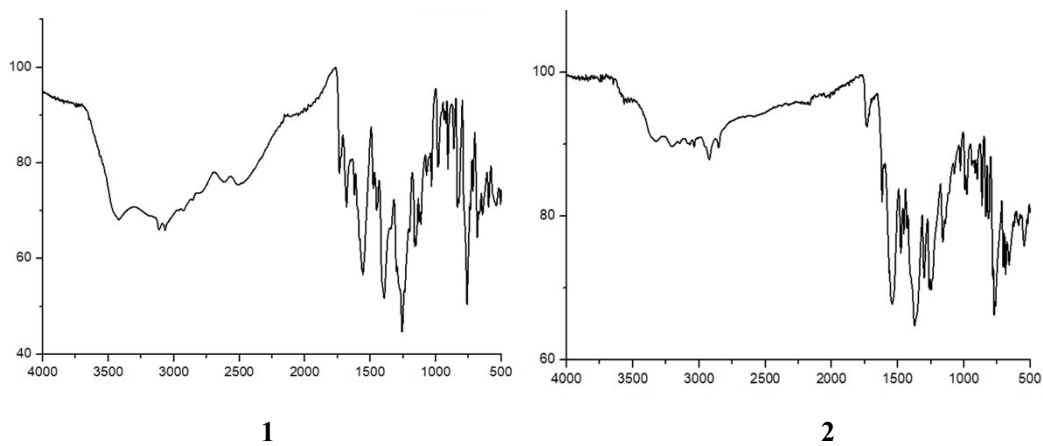

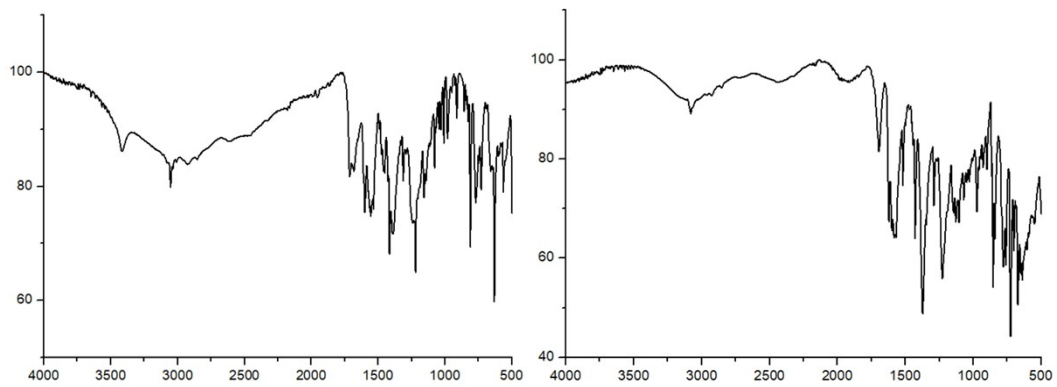

**3**

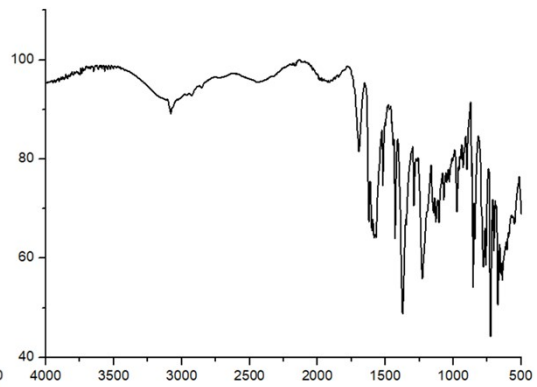

**4**

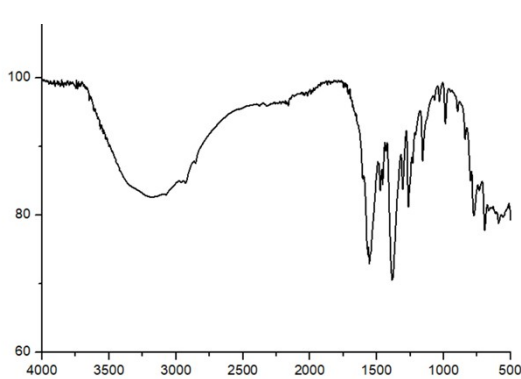

**5**

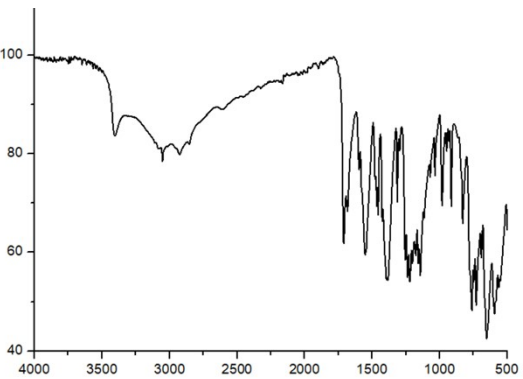

**6**

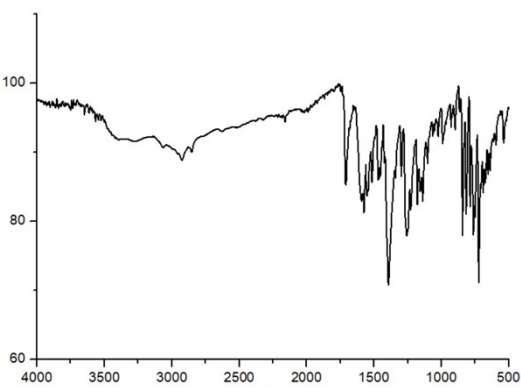

**7**

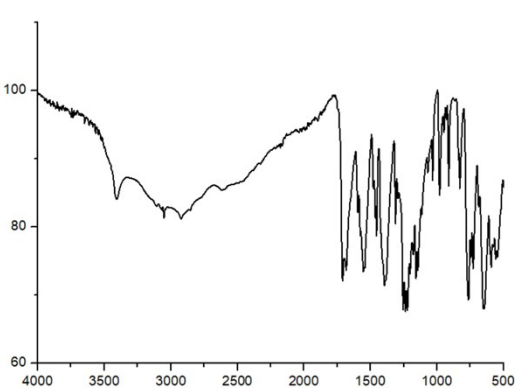

**8**

Fig. S4 Infra-red spectrogram of complex 1-8

## 5. Fluorescence spectrum

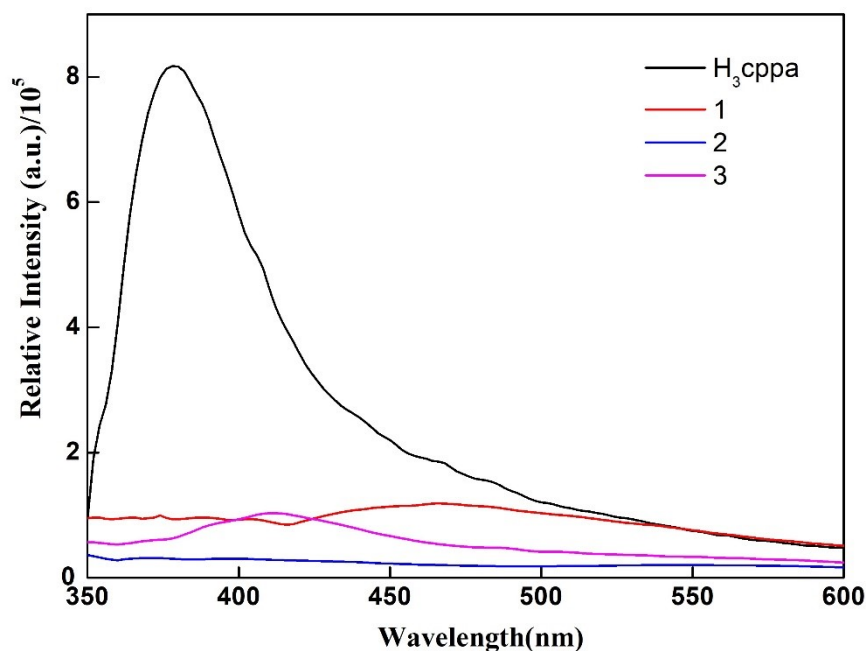

Fig. S5 Solid-state fluorescence spectra of H<sub>3</sub>cppa, 1, 2 and 3 at room temperature

The solid-state fluorescence spectra of H<sub>3</sub>cppa, complex **1**, **2** and **3** were recorded at room temperature on a FLS980 spectrophotometer under an excitation of 330 nm. The test results of the solid-state fluorescence of ligands and complexes are shown in Fig. 9, the ligand has a strong emission peak at 379 nm, while complex **1** has a weak fluorescence emission peak at 460 nm, complex **2** has a very weak fluorescence emission peak at 550 nm and complex **3** has a relatively weak fluorescence emission peak at 410 nm. The positions of the fluorescence emission peaks of complexes **1**, **2** and **3** are all red-shifted relative to the ligands, which is caused by the charge transfer caused by the coordination reaction. The formation of coordination bonds reduces the ability of the oxygen atom and N atom to withdraw electrons, resulting in a decrease in the electron density on the ligand, Then, the energy level of the frontier orbital of the ligand changes<sup>[1,2]</sup>. Ultimately leading to a red shift of the fluorescence emission peak. At the same time, the fluorescence intensities of complexes **1**, **2** and **3** are much weaker than that of ligand.

[1]. Resch-Genger U, Li Y Q, Bricks J L, Bifunctional Charge Transfer Operated Fluorescent Probes with Acceptor and Donor Receptors. 1. Biphenyl-Type Sensor Molecules with Protonation-Induced Anti-Energy Gap Rule Behavior, *J. Phys. Chem. A*, 2006, 110, 10956-10971.

[2]. Wang X Y, Wei H Y, Wang Z M, et al. FormateThe Analogue of Azide: Structural and



Magnetic Properties of  $M(\text{HCOO})_2(4,4'\text{-bpy})\cdot n\text{H}_2\text{O}$  ( $M = \text{Mn, Co, Ni}$ ;  $n = 0, 5$ )[J], *Inorg. Chem.*, 2005, 44, 572-583.
